# Supplementary material for: Maternal dietary components in the development of gestational diabetes mellitus: a review of observational studies to timely promotion of health
Source: Research Square preprint supplement (doi:10.21203/rs.3.rs-1720504/v1), 2022-06-13
Supplement: Supplementary file 2 [file 522f487969fb21858717fd5d.xlsx]

## Sheet: Table 4
Table 4. Summary of results from African and Oceanian observational studies on diet and
gestational diabetes
Paper	Regional location	Number of subjects	Study type	Population characteristics	Maternal dietary component	Effects of diet on GD
Looman M et al. 2019	Australia - Oceania	n:3607	cohort	women aged 25-30 years from the prospective Australian Longitudinal Study on Women’s Health cohort, 2003 -2015.	pre-pregnancy dietary micronutrient adequacy	Highest quartile of the Micronutrient Adequacy Ratio: RR= 0.61, 95% CI 0.43-0.86, p-trend 0.01.
Mahjoub F et al. 2021	Tunisia - Africa	n: 120 cases:60 controls:60	case-control	pregnant women aged 26-37 years from the National Institute of Nutrition, 2018.	nutrient intake and adherence to a Mediterranean diet during pregnancy	Vitamin D intake: OR= 0.29 [0.15−0.54], P < 10−3)
