# Supplementary material for: Maternal dietary components in the development of gestational diabetes mellitus: a review of observational studies to timely promotion of health
Source: Research Square preprint supplement (doi:10.21203/rs.3.rs-1720504/v1), 2022-06-13
Supplement: Supplementary file 3 [file 5e4884e9e02fe39bc462cbd4.xlsx]

## Sheet: Table 5
Table 5. Summary of results from Latinamerican observational studies on diet and gestational
diabetes
Paper	Regional location	Number of subjects	Study type	Population characteristics	maternal dietary component	Efectos sobre resultados maternos
Sartorelli DS et al. 2019	Brazil - Latin America	n: 785	cross-sectional	women aged ≥ 20 years, pre-pregnancy body mass index (BMI) ≥ 20kg/m2 recruited in five laboratories, 2011-2012	pregnancy minimally processed foods and ultra-processed foods intake	No association
Sartorelli DS et al. 2019	Brazil - Latin America	n: 785	cross-sectional	women aged ≥ 20 years, pre-pregnancy body mass index (BMI) ≥ 20kg/m2 recruited in five laboratories, 2011-2012	pregnancy dietary patterns	Dietary pattern 1 (high rice, beans, and vegetables, with low full-fat dairy products, biscuits, and sweets) OR= 0.58; 95% CI 0.36-0.95; p = 0.03
Balbi M et. al 2019	Brazil - Latin America	n: 785	cross-sectional	women aged ≥ 20 years, pre-pregnancy body mass index (BMI) ≥ 20kg/m2 recruited in five laboratories, 2011-2012	pregnancy flavonoids intake	No association
Nascimento GR et al. 2016	Brazil - Latin America	n: 838	cohort	pregnant women from a prenatal health care clinic at the Instituto de Medicina Integral Prof. Fernando Figueira (IMIP), 2011-2014	pregnancy dietary patterns	No association
Barbieri P. et al. 2016	Brazil - Latin America	n: 799	cross-sectional	pregnant women receiving care at the Public Health System of Ribeirao Preto (SP), Brazil, 2011-2012.	pregnancy dietary fat quality	∑n-3 PUFA intake: OR= 0.21; 95 % CI 0.08-0.56, p= 0,002
						α-linolenic intake: OR: 0.15; 95% CI: 0.05-0.42, p= <0.0001
						Polyunsaturated fatty acids intake: OR= 0.45; 95% CI: 0.24–0.85, p= 0.04
