# Supplementary material for: Maternal dietary components in the development of gestational diabetes mellitus: a review of observational studies to timely promotion of health
Source: Research Square preprint supplement (doi:10.21203/rs.3.rs-1720504/v1), 2022-06-13
Supplement: Supplementary file 4 [file 860a28d4b17b435d9d8508e9.xlsx]

## Sheet: Table 2
Table 2. Summary of results from European observational studies on diet and gestational diabetes
Paper	Regional location	Number of subjects	Study type	Population characteristics	Maternal dietary component	Effects of diet on GD
Tryggvadottir EA, et al. 2016	Iceland - Europa	n:168	cohort	women aged 18 to 40 years who visited the Prenatal Diagnosis Unit at the National University Hospital, 2012-2013	pregnancy dietary pattern	Prudent dietary pattern: OR= 0.54; 95% CI: 0.30, 0.98 ; Prudent pattern in overweight/obese before pregnancy: OR= 0.38; 95% CI 0.18- 0.83
Kozlowska A, et al. 2018	Polish- Europa	n:113	cross-sectional	women who visited the Medical University of Warsaw, 2016-2018.	vitamin and mineral pregnancy dietary intake	Mean vitamin C intake was higher in controls than among cases (p-value: 0.04). Mean calcium intake was higher in controls than among cases (p-value: 0.01)
Bartáková V, et al. 2018	Czech Republic - Europe	n:363 cases:293 controls:70	case-control	women aged 29-36 years who visited the Diabetes Centre of the University Hospital Brno,	pregnancy food intake	Dairy products OR= 3.149; 95% CI: 1.180- 8.403, p-value: 0.022; goodies OR= 7.600; 95% CI: 0.996- 57.964, p-value: 0.050; sweet beverages OR= 10.510; 95% CI: 1.395- 79.173, p-value: 0.022
Donazar-Ezcurra M, et al.2017	Spanish - Europe	n: 3455	cohort	women prevenient of The SUN project cohort, 2013- 2015	pre-pregnancy dietary patterns	Western dietary pattern: OR= 1,56; 95 % CI 1,00- 2,43
Mari Sanchis A et al 2018	Spanish - Europe	n: 3298	cohort	women prevenient of The SUN project cohort, 2012-2014	pre-pregnancy meat and iron intake	Total meat consumption: OR=1.67; 95% CI 1.06–2.63; p-trend 0.010 ; red meat consumption: OR=2.37; 95% CI 1.49–3.78: p-trend<0.001 ; processed meat consumption: OR=2.01; 95% CI 1.26–3.21; p-trend 0.003
Petry CJ, et al. 2019	United Kingdom- Europe	n: 865	cohort	pregnant Cambridge Baby Growth Study (CBGS) recruits.	eggs consumption	Eggs consumption was negatively associated with GD (p = 0.03)
