# Supplementary material for: Maternal dietary components in the development of gestational diabetes mellitus: a review of observational studies to timely promotion of health
Source: Research Square preprint supplement (doi:10.21203/rs.3.rs-1720504/v1), 2022-06-13
Supplement: Supplementary file 5 [file 93713e0ab394231347ad7439.xlsx]

## Sheet: Table 1
Table 1. Summary of results from Asian observational studies on diet and gestational diabetes
Paper	Regional location	Number of subjects	Study type	Population characteristics	Maternal dietary component	Effects of diet on GD
Asadi M, et al 2019	Iran- Asia	n:278 cases:130 controls:148	case-control	women aged 19–40 years who came from six healthcare centres between 2014- 2015	pre-pregnancy dietary pattern	Prudent dietary pattern: OR = 0.88, 95% CI: 0.44–0.99, p-trend= 0,02
Sedaghat F, et al. 2017	Iran- Asia	n: 388 cases:122 controls:266	case-control	women aged 18–40 years who visited major general hospitals 2009-2010	pre-pregnancy dietary pattern	Western dietary pattern: OR = 1.97, 95% CI: 1.27–3,04
Lamyian M, et al. 2017	Iran- Asia	n: 1026	cohort	women aged 18–45 years who visited 5 universities of medical sciences’ hospitals 2010-2011	pre-pregnancy fast food consumption	Total fast food consumption: OR=2.12 95% CI: 1.12–5.43, p-trend= 0.03; french fries: OR= 2.18 95% CI: 1.05–4.70, p-trend= 0.12
Zamani B. et al. 2019	Iran- Asia	n:460 cases:200 controls:260	case-control	women aged 2-44 years who visited the nutrition clinic in AL-Zahra and Shahid Beheshti hospitals, Isfahan	pregnancy plant-based dietary pattern	The high (PDI): OR=0.47; 95% CI: 0.28-0.78, P = 0.004
Zareei S. et al. 2018.	Iran - Asia	n: 204 cases:104 controls:100	case-control	women who visited the maternity ward of Valiasr Hospital in Fasa Town, 2016	pregnancy dietary pattern	Unhealthy dietary pattern: OR = 2.838 95% CI: 1.039-7.751, p-value: 0.042; healthy dietary pattern: OR = 0.284,95% CI:0.096–0.838, p-value: 0.023
Du HY et al. 2017.	China - Asia	n: 753	cohort	women who visited the Maternal and Child Health Care Hospital in China, 2013-2014.	pregnancy dietary pattern	Western pattern: OR = 4.40, 95% CI: 1.58-12.22, p-trend: 0.004); traditional pattern: OR = 4.88, 95% CI: 1.79-13.32, p-trend: 0.002)
Chen Q. et al. 2020	China - Asia	n: 9556 cases:1464 controls:8092	case-control	women who visited the First Affiliated Hospital of Shanxi Medical University in China, 2012-2016.	pre-pregnancy and pregnancy dietary pattern	Vegetable pattern 1 year prior to conception OR= 0.94; 95% CI: 0.89- 0.99, p-trend: 0,025; first trimester of pregnancy OR= 0.94; 95% CI: 0.89- 0.99, p-trend: 0,018; second trimester of pregnancy OR= 0.91; 95% CI: 0.86- 0.96, p-trend: <0.001
Zhou X et al. 2018	China - Asia	n:2755	cohort	pregnant women from the Tongji Maternal and Child Health Cohort. They have visited the maternity clinic in one of three public hospitals in Wuhan, China, since 2013-2016.	pregnancy dietary pattern	High Fish-meat-eggs scores (OR for quartile 4 vs. quartile 1= 1.83; 95 % CI 1.21, 2.79; p=0·007); high rice-wheat-fruits scores (OR for quartile 3 v. quartile 1= 0.54; 95 % CI 0.36, 0.83; p=0.010)
Dong H et al. 2021	China - Asia	n: 1455	cohort	women who visited the Sichuan Provincial Hospital for Women and Children, Southwest China, 2017	pregnancy dietary pattern	Overall Low carbohydrate dietary (LCD) pattern RR=1.24, 95% CI 1.01 - 1.52, p=0.026
Chen Q. et al. 2019	China, Asia	n: 9556 cases:1464 controls:8092	case-control	women who visited the First Affiliated Hospital of Shanxi Medical University in China, 2013-2016.	pre-pregnancy and pregnancy vitamin dietary pattern	Vitamin dietary pattern 1 year prior to conception: OR= 0.90; 95% CI: 0.85-0.95, p-trend: <0.0001; first trimester of pregnancy OR= 0.90; 95% CI: 0.86-0.95, p-trend: <0.0001; second trimester of pregnancy OR= 0.90; 95% CI: 0.85-0.95, p-trend: <0.0001
Liu C et al. 2020	China - Asia	n: 3009	cohort	women who visited the First Affiliated Hospital of Shanxi Medical University in China, 2013-2016.	pregnancy vitamin C intake	Above adequate dietary vitamin C intake OR= 0.68, 95% CI: 0.49-0.95.
Saraf-Bank S et al. 2018	Iran - Asia	n: 463 cases:200 controls:263	case-control	pregnant women aged 22-44 years who visited the Nutrition Clinic of Isfahan and Shahid Beheshti Hospital as well as Azzahra Hospital	dietary acid intake	Highest tertile of PRAL: OR= 9.27; 95% CI: 4.00-21.46, p-trend: <0,001
Parast VM et al 2017	Iran - Asia	n: 80 cases:40 controls:40	case-control	pregnant women who visited the Department of Obstetrics and Gynecology of the Shahid Beheshti Hospital, 2016	antioxidant nutrients intake	Total capacity antioxidant (TAC): OR 9.6; 95% CI: 3.4–26.8); p value: <0.001; intakes of vitamin E OR= 1.5; 95% CI: 1.2–1.9; p value: <0.001; intakes of selenium OR= 8.2; 95% CI: 1.3–52.0; p value: 0.026; intakes of zinc OR= 1.7; 95% CI: 1.2–2.5; p value: <0.001
Gao Q et al 2019	China- Asia	n: 1978	cohort	pregnant women with maternal age >18 years, who visited three public hospitals in Wuhan, 2013-2016.	carotenoids and lycopene intake	Highest quartile of lycopene intake OR= 0.50; 95% CI 0.29, 0.86; p-trend = 0·007)
Kyozuka H et al. 2021	Japan - Asia	n: 92764	cohort	Japanese women from the Japan Environment and Children’s Study (JECS), 2011-2014.	antioxidant nutrients intake	Quintil 5 Se intake OR= 1.15, 95% CI: 1.01–1.30; quintil 1 Se intake: OR: 1.19, 95% CI: 1.01–1.41
Daneshzad E et al. 2020	Iran - Asia	n: 463 cases:200 controls:263	case-control	pregnant women aged 22-44 years who visited the Nutrition Clinic of Isfahan, Iran	antioxidants and Vitamin C intake	3 tertil of FRAP OR= 0.26, 95% CI: 0.16 - 0.42; p= <0.0001
Aljanahi A et al. 2020	Saudi Arabia - Asia	n: 121 cases:72 controls:49	case-control	pregnant women aged 19-45 years who visited the King Fahad University Hospital, Maternal and Children Hospital and Family Medicine of Imam Abdulrahman Bin Faisal University.	vitamin D intake, dairy products and eggs consumption	Vitamin D dietary intake is higher among controls compared to cases (p-value: 0.021); vitamin C and eggs intake is higher among cases compared to controls (p= 0.004; p= 0.040); fortified orange juice OR= 3.2; 95% CI: 1.2- 8.8, p-value: 0.026; fortified yogurt OR= 3; 95% CI: 1.1- 8.6, p-value: 0.04 ; low-fat milk OR= 3.2; 95% CI 1.3- 7.7; p-value 0.01 ; full-fat milk OR= 0.4; 95% CI: 0.2 - 0.8; p-…
