# Supplementary material for: Maternal dietary components in the development of gestational diabetes mellitus: a review of observational studies to timely promotion of health
Source: Research Square preprint supplement (doi:10.21203/rs.3.rs-1720504/v1), 2022-06-13
Supplement: Supplementary file 6 [file ad3008ec4deb38ac4439d058.xlsx]

## Sheet: Newcasttle Otawa
The Newcastle-Ottawa quality assessment scale (NOS)
Case-control studies
Note: A study can be awarded a maximum of one star for each numbered item within the
Selection and Exposure categories. A maximum of two stars can be given for Comparability.
Selection
1) Is the case definition adequate?
a) yes, with independent validation (e.g. hospital record) ★
b) yes, e.g. record linkage or based on self-reports
c) no description
2) Representativeness of the cases
a) consecutive or obviously representative series of cases (e.g. random sample from defined
area/hospital(s)/clinic(s)) ★
b) potential for selection biases or not stated
3) Selection of Controls
a) community controls or hospital controls from the same area/hospital/clinic as cases ★
b) hospital controls from a different area/hospital/clinic as cases
c) no description
4) Definition of Controls
a) not diagnosed with disease (controls have normal glucose tolerance)★
b) no description of source
Comparability
1) Comparability of cases and controls on the basis of the design or analysis (cases and
non-cases must be matched in the design and/or confounders must be adjusted for in the
analysis relevant to results included in this review)
a) study controls for maternal age, diabetes prior to pregnancy and body mass index. ★
b) study controls for any additional factor (e.g. ethnicity, parity, family history of diabetes,
smoking, physical activity, other dietary factors) ★
Exposure
1) Ascertainment of exposure.
a) secure record (e.g. hospital record) ★
b) structured interview/validated dietary recall/diet history/ food frequency questionnaire
case/control status
c) interview/validated dietary recall/diet history/ food frequency questionnaire not blinded to
where blind to case/control status
d) written self-report or medical record only (e.g. non-validated dietary assessment)
e) no description
2) Same method of ascertainment for cases and controls
a) yes ★
b) no
3) Non-Response rate
a) same rate for both groups ★
b) non-respondents described (description provided of those lost)
c) rate different and no designation (no statement on non-response)
Supplementary Table 6. Quality assessment of case-control studies on maternal dietary
components and gestational diabetes.
Study	Selection				Comparability	Exposure			Total score
	Case definition	Case representativeness	Control selection	Control definition	Comparability of cases and controls on bases of design or analyses	Exposure ascertainment	Similar ascertainment method for cases and controls	Non-response rate
Asadi M, et al 2019	A	B	A	A	B	D	A	C	5
Sedaghat F, et al. 2017	A	B	A	A	B	B	A	B	5
Zamani B. et al. 2019	A	B	A	A	B	D	A	B	5
Zareei S. et al. 2018.	A	B	A	A	A-B	B	A	C	6
Chen Q. et al. 2020	A	B	A	A	A-B	A	A	B	7
Chen Q. et al. 2019	A	B	A	A	A-B	A	A	B	7
Saraf-Bank S et al. 2018	A	B	A	A	A-B	D	A	C	6
Parast VM et al 2017	A	B	A	A	A-B	B	A	C	6
Daneshzad E et al. 2020	A	B	A	A	A-B	A	A	C	7
Aljanahi A et al. 2020	A	B	A	A	A	B	A	C	5
Bartáková V, et al. 2018	A	B	B	A	A-B	B	A	A	6
Mahjoub F et al. 2021	B	B	A	A	B	B	A	C	4
Cohort studies
Note: A study can be awarded a maximum of one star for each numbered item within the
Selection and Outcome categories. A maximum of two stars can be given for Comparability
Selection
1) Representativeness of the exposed cohort
a) truly representative of the average reproductive-aged women in the community
(random sample) ★
b) somewhat representative of the average reproductive-aged women in the community ★
c) selected group of users e.g. only specific occupation
d) no description of the derivation of the cohort
2) Selection of the non-exposed cohort
a) drawn from the same community as the exposed cohort ★
b) drawn from a different source
c) no description of the derivation of the non-exposed cohort
3) Ascertainment of exposure
a) secure record (e.g. hospital record) ★
b) structured interview/validated dietary recall/diet history/ food frequency questionnaire ★
c) written self-report (e.g. non-validated dietary assessment)
d) no description
4) Demonstration that outcome of interest was not present at start of study
a) yes (no type 1 or type 2 diabetes) ★
b) no
Comparability
1) Comparability of cohorts on the basis of the design or analysis (cases and non-cases must be
matched in the design and/or confounders must be adjusted for in the analysis relevant to
results included in this review)
a) study controls for maternal age, diabetes prior to pregnancy and body mass index ★
b) study controls for any additional factor (e.g. ethnicity, parity, family history of diabetes,
smoking, physical activity, other dietary factors) ★
Outcome
1) Assessment of outcome
a) independent blind assessment (e.g. hospital record/oral glucose tolerance test) ★
b) record linkage or validated self-reported diagnosis ★
c) self-report (not validated)
d) no description
2) Was follow-up long enough for outcomes to occur
a) yes, if all women were screened (generally at 24-28 weeks gestation) and followed-up until
diagnosis ★
b) no
3) Adequacy of follow up of cohorts
a) complete follow up - all subjects accounted for ★
b) subjects lost to follow up unlikely to introduce bias - small number lost ≤20% follow up, or
description provided of those lost ★
c) follow up rate <80% or no description of those lost
d) no statement
Supplementary Table 7. Quality assessment of cohort studies on maternal dietary components
and gestational diabetes.
Supplementary Information	Selection				Comparability	Exposure
	Representativeness of exposed cohort	Selection of non exposed cohort	Ascertainment of exposure	Outcome not present at start of study	Comparability of cases and controls on bases of design or analyses	Outcome assessment	Adequate duration of follow- up	Adequacy of follow up rate	Total score
Lamyian M, et al. 2017	B	A	B	A	A-B	A	A	B	6
Du HY et al. 2017.	B	A	B	A	A-B	A	A	B	6
Zhou X et al. 2018	B	A	B	A	A-B	A	A	A	7
Dong H et al. 2021	B	A	B	A	A-B	A	A	A	7
Liu C et al. 2020	B	A	B	A	A	A	A	A	6
Gao Q et al 2019	B	A	B	A	A-B	A	A	B	6
Kyozuka H et al. 2021	B	A	B	A	A-B	A	A	A	9
Tryggvadottir EA, et al. 2016	B	A	B	A	A-B	B	A	B	5
Donazar-Ezcurra M, et al.2017	B	A	B	A	A-B	B	B	A	5
Mari Sanchis A et al 2018	C	A	B	A	A-B	A	A	A	7
Petry CJ, et al. 2019	B	A	C	A	A-B	A	A	B	6
Nascimento GR et al. 2016	B	A	B	A	A-B	A	A	B	6
Bao W et al. 2017	C	A	B	A	A-B	B	A	B	5
Li M. et al. 2019	C	A	B	A	A-B	B	A	B	5
Shin D. et al. 2015	A	A	B	A	A-B	B	A	C	6
Osorio-Yáñez Citlalli et al. 2017	B	A	C	A	A-B	A	A	C	6
Darling AM et al. 2016	B	A	B	A	A-B	C	B	A	7
Looman M et al. 2019	B (dudas)	A	C	A	A-B	B	A	A	8
Cross-sectional studies
Sartorelli DS et al. 2019 (cross-sectional)	B	A	A	A	A-B	A	A	A	9
Sartorelli DS et al. 2019 (cross-sectional)	B	A	A	A	A-B	A	A	A	9
Balbi M et. al 2019 (cross-sectional)	B	A	A	A	A-B	A	A	A	9
Kozlowska A, et al. 2018 (cross-sectional)	B	A	B	A	-	A	-	C	3
Barbieri P. et al. 2016 (cross-sectional)	B	A	B	A	A-B	A	-	C	5
