# Supplementary material for: Maternal dietary components in the development of gestational diabetes mellitus: a review of observational studies to timely promotion of health
Source: Research Square preprint supplement (doi:10.21203/rs.3.rs-1720504/v1), 2022-06-13
Supplement: Supplementary file 7 [file 2a31ce9cb8d29a64e190572d.xlsx]

## Sheet: Table 3
Table 3. Summary of results from North American observational studies on diet and
gestational diabetes.
Paper	Regional location	Number of subjects	Study type	Population characteristics	Maternal dietary component	Effects of diet on GD
Bao W et al. 2017	USA- - North America	n: 15225	cohort	pregnant women aged 24-44 years from the Nurses' Health Study II cohort, 1991-2001	pre pregnancy vitamin D intake	No association
Li M. et al. 2019	USA - North America	n: 14553	cohort	pregnant women aged 24-44 years from the Nurses’ Health Study II, 1991-2001.	pre pregnancy food folate intake	Adequate total folate intake (‡400 mg/day) RR= 0.83; 95% CI 0.72- 0,95, p= 0.007)
Shin D. et al. 2015	USA- North América	n:253	cohort	pregnant women (16–41 years) included in the National Health and Nutrition Examination Survey (NHANES) 2003–2012.	pregnancy dietary patterns	“High refined grains, fats, oils and fruit juice” pattern: OR= 4.9; 95% CI 1.4–17.0, p-trend: 0.007; “high nuts, seeds, fat and soybean; low milk and cheese” pattern: OR= 7.5; 95% CI 1.8–32.3, p-trend: 0.009; “high added sugar and organ meats; low fruits, vegetables and seafood” pattern: OR= 22.3; 95% CI 3.9–127.4, p-trend: <0.0001
Osorio-Yáñez Citlalli et al. 2017	USA - North America	n: 3414	cohort	pregnant women attending prenatal care clinics affiliated with the Swedish Medical Center and Tacoma General Hospital in Seattle and Tacoma, 1996-2008	calcium and dairy products intake	Ca intake: RR=0·58; 95 % CI 0·38- 0·90; p=0·015; low fat dairy product RR= 0,57; 95% CI: 0,32- 1,02 p= 0,032; whole grains RR: 0,61; 95% CI: 0,39- 0,95, P= 0·019
Darling AM et al. 2016	USA, Canada - North America	n: 7229	cohort	pregnant women from the Slone Epidemiology Center Birth Defects Study, in the United States and Canada, 1998-2008	pre-pregnancy iron intake	Preconceptional dietary heme-iron 2.53; 95% CI: 1.70- 3.78, p-trend: 0.02; preconceptional dietary non-heme iron RR= 0.53; 95% CI: 0.34- 0.83, p-trend: 0.13
